# Supplementary material for: Urothelial organoids originating from Cd49fhigh mouse stem cells display Notch-dependent differentiation capacity
Source: Springer Nature journal article supplement (doi:10.1038/s41467-019-12307-1), 2019-09-27
Supplement: MOESM6 [file 41467_2019_12307_MOESM6_ESM.pdf]

**Title:** Supplementary Movie 1

**Description:** Example of proliferative and differentiated during FRAP assay (prebleaching, post-bleaching and recovery) over a 14 h period.

**Title:** Supplementary Data 1.

**Description:** Differentially expressed genes in P vs D organoids from bulk RNA-Seq analyses.

**Title:** Supplementary Data 2.

**Description:** Cluster markers and variable features for individual and integrated scRNA-Seq analyses.
